# Supplementary material
Source: publisher figshare collection journal article supplement (https://tandf.figshare.com/articles/dataset/_/1263957)
Supplement: Supplementary file 1 [file 3]

Archive with 3 entries (3 files):
- tigr_a_986669_sm2934.pdf
- tigr_a_986669_sm2925.pdf
- tigr_a_986669_sm2723.docx
