# Supplementary material
Source: publisher figshare collection journal article supplement (https://tandf.figshare.com/articles/dataset/_/1263957)
Supplement: Supplementary file 1 [file 3 › tigr_a_986669_sm2723.docx]

Table S1. Ion microprobe U-(Th)-Pb zircon data of leucogranites

| Spot ID | 206Pb*/  238U | ±1 s.e. | 207Pb*/  235U | ±1 s.e. | 207Pb*/  206Pb* | ±1 s.e. | 206Pb*  (%) | Correlation  of Concordia  Ellipses | UO/U | U/Th | U (ppm) | Age (Ma) ± 1 s.e. | | |
| --- | --- | --- | --- | --- | --- | --- | --- | --- | --- | --- | --- | --- | --- | --- |
| 206Pb*/238U | 207Pb*/235U | 207Pb*/206Pb* |
|  | | | | | | | | | | | | | | |
| DH11-21-10 4 | | | | | | | | | | | | | | |
| 1, 1 | 0.00356 | 0.00007 | 0.0232 | 0.0006 | 0.0473 | 0.0008 | 99.4 | 0.74 | 9.15 | 93.3 | 15959 | 22.9±0.4 | 23.3±0.5 | 66.6±37.9 |
| 2, 1 | 0.00351 | 0.00006 | 0.0210 | 0.0029 | 0.0434 | 0.0057 | 88.9 | 0.35 | 9.48 | 91.5 | 9356 | 22.6±0.4 | 21.1±2.8 | Negative |
| 2, 2 | 0.00292 | 0.00006 | 0.0199 | 0.0028 | 0.0494 | 0.0067 | 77.9 | 0.35 | 8.72 | 69.7 | 3786 | 18.8±0.4 | 20.0±2.8 | 168.3±315.0 |
| 7, 1 | 0.00326 | 0.00006 | 0.0215 | 0.0005 | 0.0477 | 0.0007 | 99.7 | 0.81 | 9.30 | 151.1 | 12272 | 21.0±0.4 | 21.6±0.5 | 85.4±33.3 |
| 8, 1 | 0.00312 | 0.00006 | 0.0214 | 0.0041 | 0.0497 | 0.0092 | 81.9 | 0.44 | 9.13 | 172.1 | 8199 | 20.1±0.4 | 21.5±4.1 | 179.6±432.0 |
| 8, 3 | 0.00319 | 0.00005 | 0.0205 | 0.0004 | 0.0465 | 0.0007 | 99.9 | 0.69 | 9.98 | 123.3 | 10800 | 20.6±0.3 | 20.6±0.4 | 25.5±37.0 |
| 9, 1 | 0.07873 | 0.00172 | 0.5594 | 0.0338 | 0.0515 | 0.0028 | 99.2 | 0.44 | 9.10 | 1.7 | 182 | 489±10 | 451±22 | 265±125 |
| 13, 2 | 0.00322 | 0.00006 | 0.0210 | 0.0006 | 0.0472 | 0.0009 | 99.8 | 0.76 | 8.92 | 135.7 | 5680 | 20.7±0.4 | 21.1±0.6 | 61.0±43.5 |
| 14, 1 | 0.00248 | 0.00008 | 0.0170 | 0.0087 | 0.0497 | 0.0244 | 90.0 | 0.62 | 9.21 | 38.3 | 2327 | 15.9±0.5 | 17.1±8.7 | 182.9±1140.0 |
| 14, 2 | 0.00415 | 0.00008 | 0.0267 | 0.0011 | 0.0466 | 0.0014 | 99.1 | 0.66 | 9.81 | 135.8 | 9407 | 26.7±0.5 | 26.7±1.1 | 31.1±73.6 |
| 20, 1 | 0.00303 | 0.00006 | 0.0198 | 0.0007 | 0.0474 | 0.0012 | 99.7 | 0.71 | 8.77 | 108.0 | 7201 | 19.5±0.4 | 19.9±0.7 | 67.9±61.6 |
| 20, 2 | 0.00317 | 0.00008 | 0.0137 | 0.0046 | 0.0314 | 0.0102 | 64.8 | 0.44 | 9.23 | 125.4 | 9289 | 20.4±0.5 | 13.8±4.6 | Negative |
| 23, 1 | 0.08203 | 0.00191 | 0.6366 | 0.0277 | 0.0563 | 0.0021 | 99.4 | 0.50 | 9.04 | 2.3 | 238 | 508±11 | 500±17 | 464±84 |
| 25, 1 | 0.00330 | 0.00006 | 0.0207 | 0.0007 | 0.0455 | 0.0013 | 98.8 | 0.57 | 9.31 | 189.2 | 8298 | 21.3±0.4 | 20.8±0.7 | Negative |
| 25, 2 | 0.00237 | 0.00007 | 0.0117 | 0.0068 | 0.0360 | 0.0203 | 71.0 | 0.58 | 9.75 | 37.2 | 3411 | 15.2±0.5 | 11.8±6.9 | Negative |
| 26, 1 | 0.00350 | 0.00007 | 0.0228 | 0.0006 | 0.0471 | 0.0007 | 99.8 | 0.81 | 9.46 | 125.9 | 9608 | 22.6±0.4 | 22.9±0.6 | 55.1±35.9 |
| 29, 1 | 0.00333 | 0.00006 | 0.0213 | 0.0005 | 0.0464 | 0.0009 | 99.9 | 0.66 | 9.01 | 195.6 | 8923 | 21.5±0.4 | 21.4±0.5 | 16.2±45.0 |
| 29, 2 | 0.00249 | 0.00005 | 0.0158 | 0.0008 | 0.0461 | 0.0021 | 99.7 | 0.34 | 9.30 | 362.2 | 2813 | 16.0±0.3 | 15.9±0.8 | 2.8±112.0 |
| 29, 3 | 0.00345 | 0.00007 | 0.0228 | 0.0006 | 0.0479 | 0.0010 | 99.9 | 0.65 | 9.16 | 167.4 | 11301 | 22.2±0.4 | 22.8±0.6 | 92.5±49.0 |
| 33, 1 | 0.00300 | 0.00006 | 0.0197 | 0.0006 | 0.0477 | 0.0012 | 99.8 | 0.50 | 9.33 | 632.9 | 6104 | 19.3±0.4 | 19.8±0.6 | 81.8±61.7 |
| 33, 2 | 0.00214 | 0.00012 | 0.0161 | 0.0129 | 0.0546 | 0.0418 | 79.3 | 0.61 | 9.51 | 80.8 | 2295 | 13.8±0.8 | 16.2±12.9 | 396.1±1720.0 |
| 33, 3 | 0.00307 | 0.00005 | 0.0197 | 0.0005 | 0.0464 | 0.0010 | 99.9 | 0.55 | 9.43 | 345.1 | 8037 | 19.8±0.3 | 19.8±0.5 | 20.7±52.5 |
| 35, 2 | 0.07942 | 0.00183 | 0.6157 | 0.0202 | 0.0562 | 0.0015 | 99.8 | 0.61 | 8.98 | 2.3 | 523 | 493±11 | 487±13 | 461±58 |
| 35, 3 | 0.08044 | 0.00176 | 0.6250 | 0.0245 | 0.0564 | 0.0016 | 99.7 | 0.70 | 9.15 | 2.7 | 385 | 499±11 | 493±15 | 466±64 |
|  | | | | | | | | | | | | | | |
| DH12-12-10 2 | | | | | | | | | | | | | | |
| 3, 1 | 0.15530 | 0.00341 | 1.5970 | 0.0339 | 0.0746 | 0.0005 | 100.0 | 0.95 | 8.97 | 3.7 | 1815 | 931±19 | 969±13 | 1057±14 |
| 3, 2 | 0.00426 | 0.00009 | 0.0283 | 0.0014 | 0.0481 | 0.0023 | 98.9 | 0.33 | 9.11 | 105.4 | 1700 | 27.4±0.6 | 28.3±1.4 | 102.7±111.0 |
| 9, 1 | 0.00437 | 0.00009 | 0.0290 | 0.0011 | 0.0481 | 0.0016 | 99.7 | 0.47 | 8.95 | 99.7 | 2972 | 28.1±0.6 | 29.0±1.1 | 103.1±80.9 |
| 9, 2 | 0.00448 | 0.00010 | 0.0264 | 0.0066 | 0.0428 | 0.0103 | 69.4 | 0.48 | 9.03 | 78.9 | 9149 | 28.8±0.7 | 26.5±6.6 | Negative |
| 10, 1 | 0.00425 | 0.00008 | 0.0279 | 0.0015 | 0.0475 | 0.0022 | 98.3 | 0.47 | 9.19 | 130.1 | 4200 | 27.4±0.5 | 27.9±1.5 | 73.5±112.0 |
| 10, 2 | 0.00530 | 0.00012 | 0.0310 | 0.0047 | 0.0425 | 0.0061 | 86.1 | 0.37 | 8.72 | 112.5 | 11875 | 34.1±0.8 | 31.0±4.6 | Negative |
| 12, 1 | 0.08754 | 0.00164 | 0.8051 | 0.0217 | 0.0667 | 0.0012 | 99.9 | 0.75 | 9.20 | 13.1 | 623 | 541±10 | 600±12 | 829±37 |
| 15, 1 | 0.02566 | 0.00059 | 0.2384 | 0.0096 | 0.0674 | 0.0020 | 99.4 | 0.68 | 9.04 | 13.2 | 1343 | 163±4 | 217±8 | 849±63 |
| 15, 2 | 0.00457 | 0.00009 | 0.0297 | 0.0007 | 0.0472 | 0.0008 | 99.8 | 0.75 | 9.01 | 79.3 | 8778 | 29.4±0.5 | 29.7±0.7 | 57.0±39.0 |
| 17, 1 | 0.01352 | 0.00046 | 0.1011 | 0.0046 | 0.0542 | 0.0019 | 99.5 | 0.65 | 9.03 | 17.4 | 1854 | 86.6±2.9 | 97.8±4.2 | 380.9±78.0 |
| 17, 2 | 0.00479 | 0.00010 | 0.0309 | 0.0007 | 0.0469 | 0.0007 | 99.8 | 0.79 | 9.12 | 168.5 | 8892 | 30.8±0.6 | 30.9±0.7 | 41.5±34.2 |
| 18, 1 | 0.01747 | 0.00048 | 0.1415 | 0.0048 | 0.0587 | 0.0013 | 99.8 | 0.75 | 8.97 | 47.3 | 1320 | 112±3 | 134±4 | 557±48 |
| 18, 2 | 0.00393 | 0.00009 | 0.0256 | 0.0014 | 0.0473 | 0.0024 | 99.4 | 0.43 | 8.66 | 192.5 | 3252 | 25.3±0.6 | 25.7±1.4 | 64.1±119.0 |
| 21, 1 | 0.00457 | 0.00009 | 0.0290 | 0.0012 | 0.0461 | 0.0016 | 99.2 | 0.60 | 9.17 | 104.6 | 2360 | 29.4±0.6 | 29.0±1.2 | 0.9±82.3 |
| 21, 2 | 0.00431 | 0.00009 | 0.0279 | 0.0012 | 0.0469 | 0.0018 | 99.1 | 0.51 | 8.83 | 176.8 | 3159 | 27.7±0.6 | 27.9±1.2 | 42.0±89.5 |
| 22, 1 | 0.00466 | 0.00009 | 0.0291 | 0.0014 | 0.0454 | 0.0020 | 99.4 | 0.46 | 9.17 | 113.3 | 1893 | 30.0±0.6 | 29.2±1.4 | Negative |
| 23, 1 | 0.00539 | 0.00011 | 0.0357 | 0.0015 | 0.0481 | 0.0019 | 99.2 | 0.45 | 9.00 | 162.9 | 1922 | 34.7±0.7 | 35.7±1.5 | 103.6±91.2 |
| 23, 2 | 0.00513 | 0.00010 | 0.0336 | 0.0011 | 0.0475 | 0.0012 | 97.9 | 0.66 | 8.76 | 145.6 | 8207 | 33.0±0.6 | 33.5±1.1 | 73.7±57.9 |
| 24, 1 | 0.00458 | 0.00009 | 0.0296 | 0.0009 | 0.0469 | 0.0011 | 99.7 | 0.62 | 8.97 | 226.5 | 6404 | 29.4±0.6 | 29.6±0.9 | 43.1±57.7 |
| 24, 2 | 0.05178 | 0.00115 | 0.5531 | 0.0147 | 0.0775 | 0.0008 | 99.8 | 0.92 | 9.06 | 6.9 | 1332 | 325±7 | 447±10 | 1133±21 |
| 25, 1 | 0.01065 | 0.00027 | 0.0848 | 0.0027 | 0.0578 | 0.0013 | 99.8 | 0.73 | 8.92 | 21.8 | 4659 | 68±2 | 83±3 | 520±48 |
| 25, 2 | 0.00422 | 0.00008 | 0.0272 | 0.0008 | 0.0467 | 0.0010 | 99.5 | 0.65 | 9.07 | 129.8 | 5170 | 27.2±0.5 | 27.2±0.8 | 34.9±53.0 |
| 26, 1 | 0.06403 | 0.00127 | 0.5194 | 0.0111 | 0.0588 | 0.0005 | 99.9 | 0.93 | 8.91 | 20.3 | 2366 | 400±8 | 425±7 | 561±17 |
| 26, 2 | 0.00381 | 0.00010 | 0.0224 | 0.0085 | 0.0426 | 0.0155 | 53.1 | 0.50 | 8.71 | 162.6 | 3800 | 24.5±0.7 | 22.5±8.4 | Negative |
| 34, 1 | 0.00492 | 0.00010 | 0.0310 | 0.0016 | 0.0457 | 0.0022 | 99.5 | 0.43 | 9.00 | 88.3 | 1821 | 31.6±0.7 | 31.0±1.6 | Negative |
| 34, 2 | 0.00359 | 0.00008 | 0.0228 | 0.0016 | 0.0461 | 0.0030 | 99.0 | 0.31 | 8.72 | 131.3 | 2589 | 23.1±0.5 | 22.9±1.5 | 5.2±155.0 |
| 36, 1 | 0.00487 | 0.00010 | 0.0321 | 0.0008 | 0.0478 | 0.0008 | 99.8 | 0.70 | 8.88 | 195.7 | 7458 | 31.3±0.7 | 32.1±0.8 | 91.1±42.0 |
| 36, 2 | 0.00415 | 0.00008 | 0.0263 | 0.0009 | 0.0459 | 0.0012 | 99.8 | 0.64 | 9.16 | 113.2 | 4481 | 26.7±0.5 | 26.3±0.9 | Negative |
| 37, 1 | 0.00473 | 0.00009 | 0.0304 | 0.0012 | 0.0467 | 0.0017 | 99.1 | 0.44 | 9.18 | 101.7 | 2931 | 30.4±0.6 | 30.4±1.2 | 33.4±86.1 |
| 37, 2 | 0.00461 | 0.00009 | 0.0303 | 0.0009 | 0.0477 | 0.0008 | 99.2 | 0.78 | 9.02 | 111.0 | 9420 | 29.6±0.6 | 30.3±0.8 | 82.7±42.1 |
| 38, 1 | 0.01337 | 0.00067 | 0.2043 | 0.0126 | 0.1108 | 0.0027 | 99.7 | 0.92 | 8.94 | 61.6 | 1641 | 86±4 | 189±11 | 1813±45 |
| 38, 2 | 0.00448 | 0.00008 | 0.0290 | 0.0008 | 0.0470 | 0.0009 | 99.8 | 0.75 | 9.41 | 103.1 | 7553 | 28.8±0.5 | 29.1±0.8 | 47.4±46.3 |
| 40, 1 | 0.00708 | 0.00037 | 0.0603 | 0.0042 | 0.0618 | 0.0027 | 96.5 | 0.78 | 9.36 | 55.5 | 1979 | 45.5±2.4 | 59.5±4.0 | 667.0±92.0 |
| 40, 2 | 0.00584 | 0.00021 | 0.0394 | 0.0019 | 0.0490 | 0.0010 | 99.9 | 0.91 | 9.13 | 76.9 | 8714 | 37.5±1.4 | 39.3±1.9 | 147.6±50.0 |

Spot ID: #, # = grain #, spot #.

1 s.e. = 1σ standard error.

External reproducibility of 206Pb/238U age of AS3 standard zircon 1.7% (1 standard deviation; n = 27). UO/U of standards between 8.8 and 9.2.

Common Pb correction using Southern California anthropogenic 206Pb/204Pb = 18.86, 207Pb/204Pb = 15.62, and 208Pb/204Pb = 38.34.
