# Supplementary material
Source: publisher figshare collection journal article supplement (https://tandf.figshare.com/articles/dataset/_/1263957)
Supplement: Supplementary file 1 [file 3 › tigr_a_986669_sm2925.pdf]

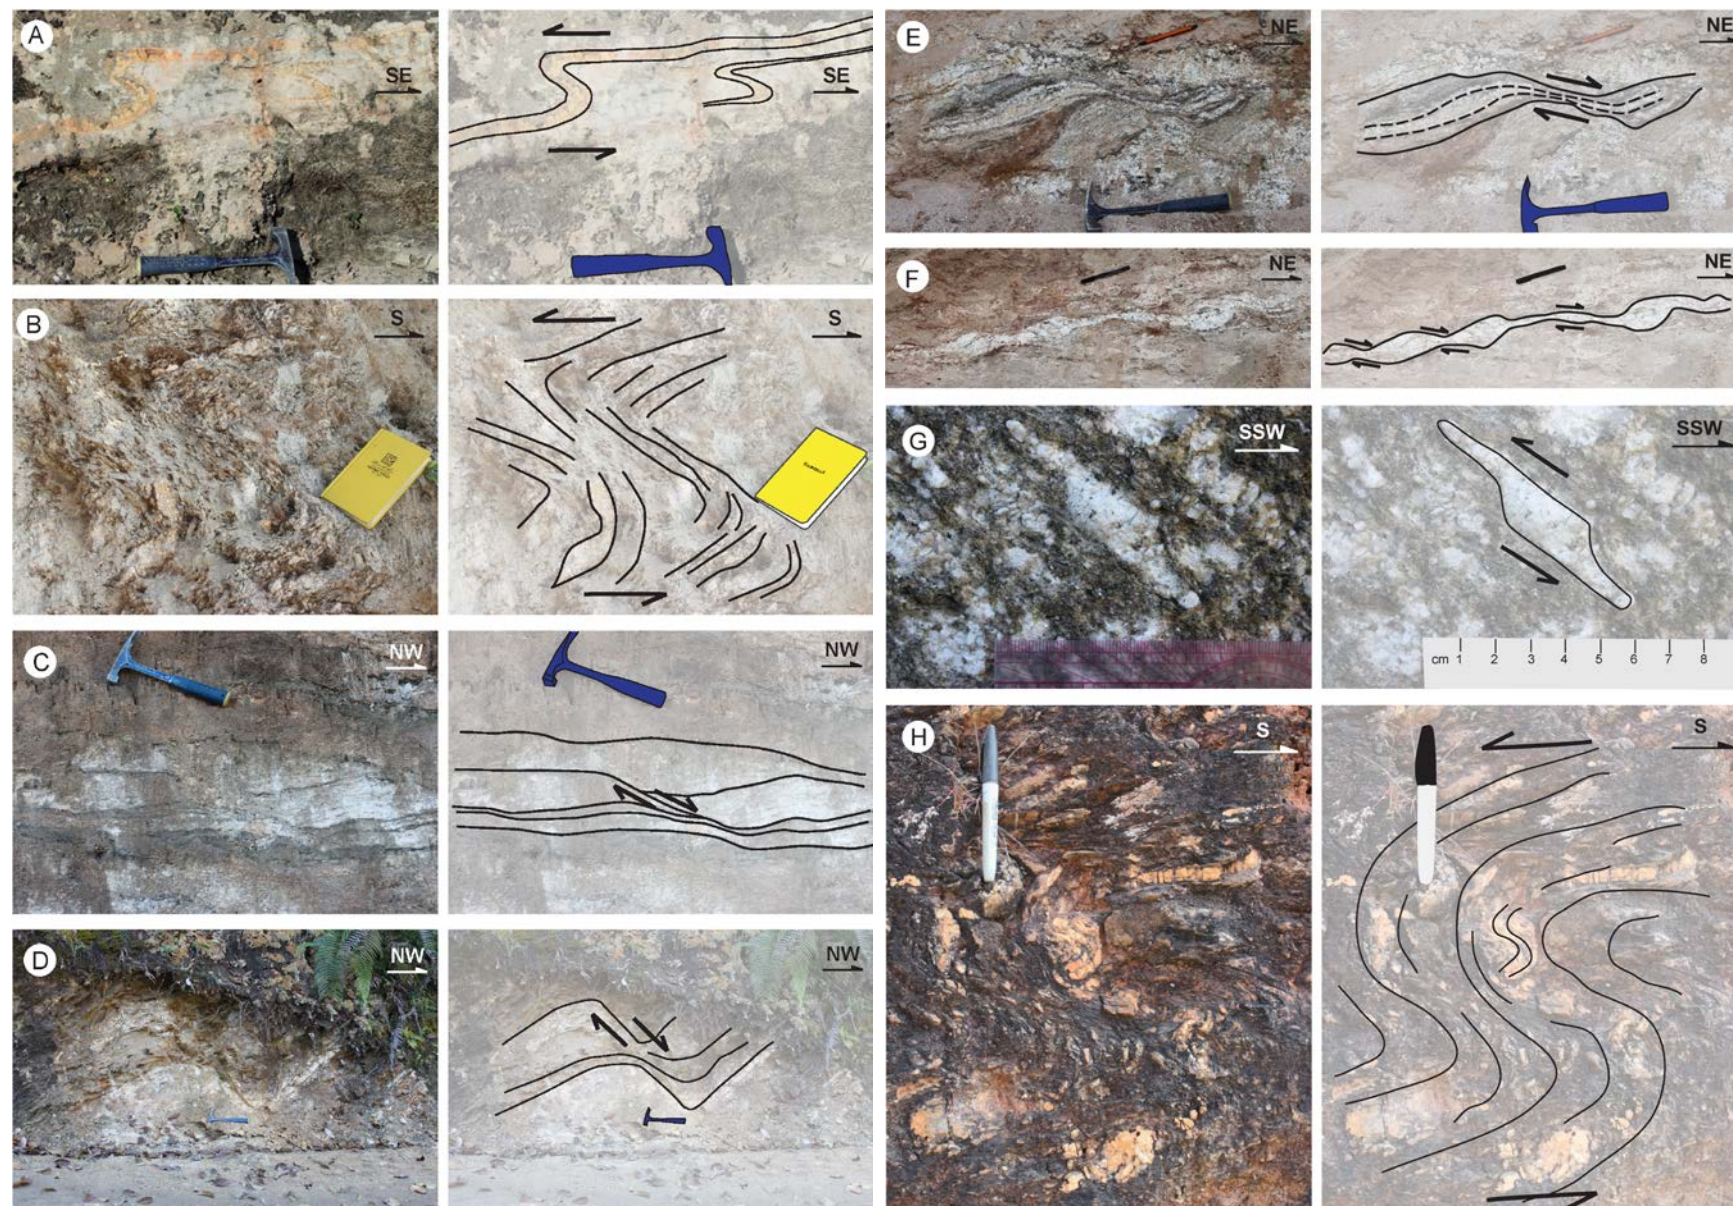

**Figure S1.** Field photographs and line diagrams of deformation fabrics across the Galchi shear 1512 zone along the northern margin of the Kathmandu Nappe. Locations are marked in Figure 6. (A) Asymmetrically folded thin layers near Kakani. (B) S-type folded schist near Kakani. (C) Top-to-the-northwest asymmetric boudinage with shear band offsetting gneissic foliation near Chisapani. (D) Foliation offset by shear band in calc-silicates near Chisapani. (E) Top-to-the-northeast asymmetric boudinage showing that gneissic foliation is offset by a shear band near Lapsephedi. (F) Top-to-the-northeast asymmetric boudinage chain near Lapsephedi. (G) A sigma-type porphyroclast in granitic gneisses near Lapsephedi. (H) An S-type fold in schist near Lamidanda. Note that the leucogranite was deformed by boudinage to form leucosome aggregates.
