# Supplementary material
Source: publisher figshare collection journal article supplement (https://tandf.figshare.com/articles/dataset/_/1263957)
Supplement: Supplementary file 1 [file 3 › tigr_a_986669_sm2934.pdf]

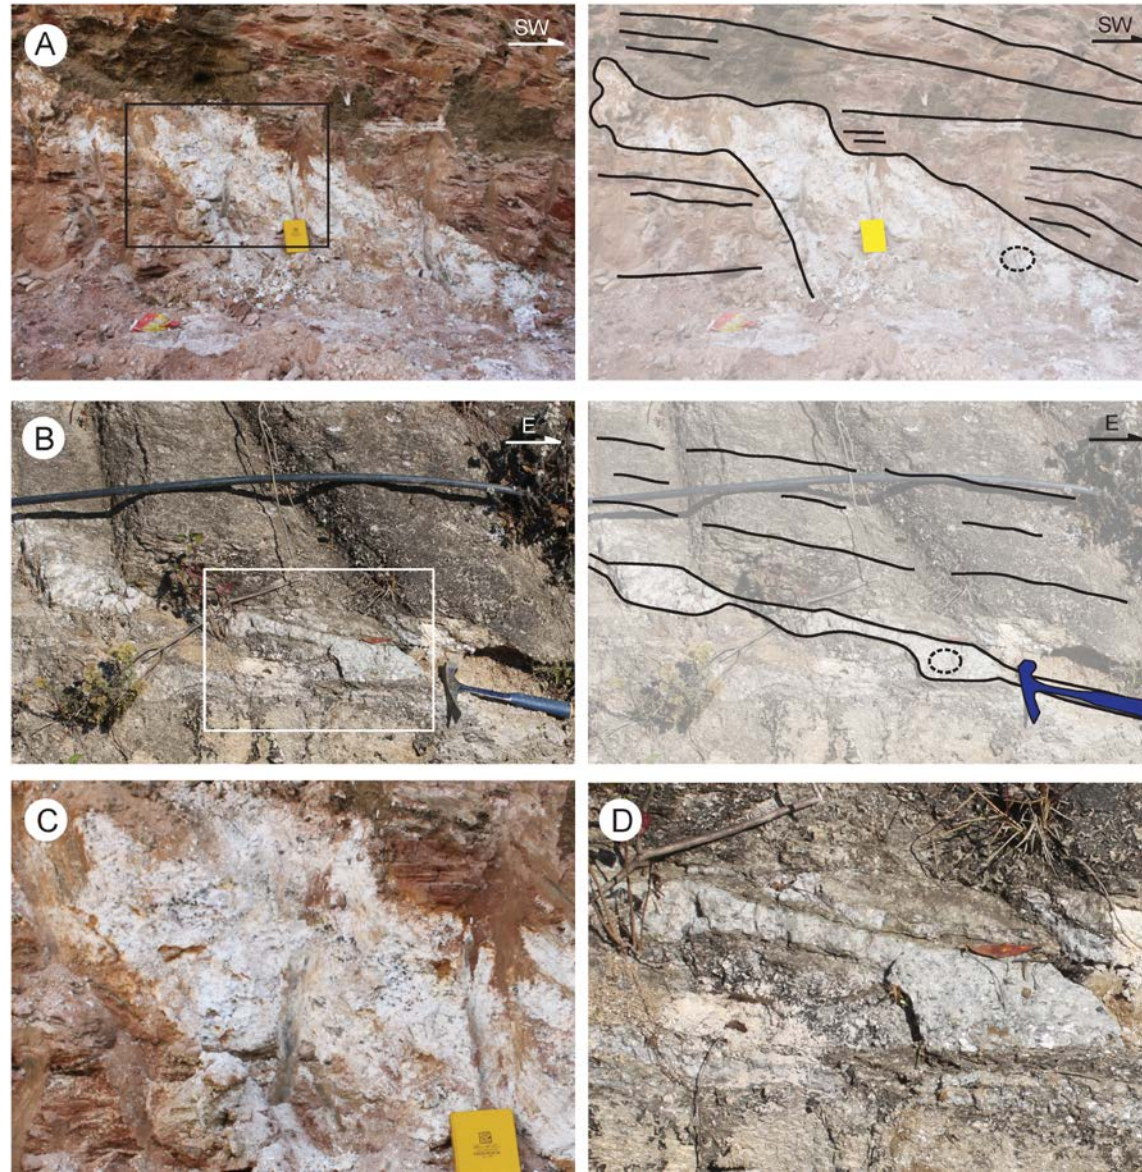

**Figure S2.** Field photographs of structural relationship of leucogranites for U-Pb zircon dating. (A) Sample DH11-21-10 4: photograph and line diagram of a leucogranite body crosscutting the foliation of host rocks. (B) Sample DH12-12-10 2: photograph and line diagram of a leucogranite vein parallel to the foliation of host rocks. The dashed ellipses indicate the sample locations. (C) Close-up view of the DH12-12-10 2. The extent of the view is outlined in (A). (D) Close-up view of the DH12-12-10 2. The extent of the view is outlined in (B)..
